# Supplementary material for: Insights into the Complexity and Functionality of Hepatitis C Virus NS5A Phosphorylation
Source: PubMed Central journal article supplement (PMC3911623; doi:10.1128/jvi.03017-13), 2014-02
Supplement: JVI.03017-13_zjv999098599so1.pdf [file JVI.03017-13_zjv999098599so1.pdf]

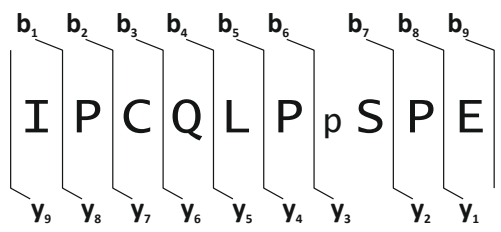

| Seq. | b-ions             | y-ions             |
|------|--------------------|--------------------|
| I    | b1 <b>114.0913</b> | y9 -               |
| P    | b2 211.1441        | y8 909.4135        |
| C    | b3 <b>371.1748</b> | y7 812.3607        |
| Q    | b4 <b>499.2333</b> | y6 652.3301        |
| L    | b5 <b>612.3174</b> | y5 524.2715        |
| P    | b6 709.3702        | y4 <b>411.1874</b> |
| S    | b7 <b>778.3916</b> | y3 <b>314.1347</b> |
| P    | b8 875.4444        | y2 <b>245.1132</b> |
| E    | b9 -               | y1 148.0604        |

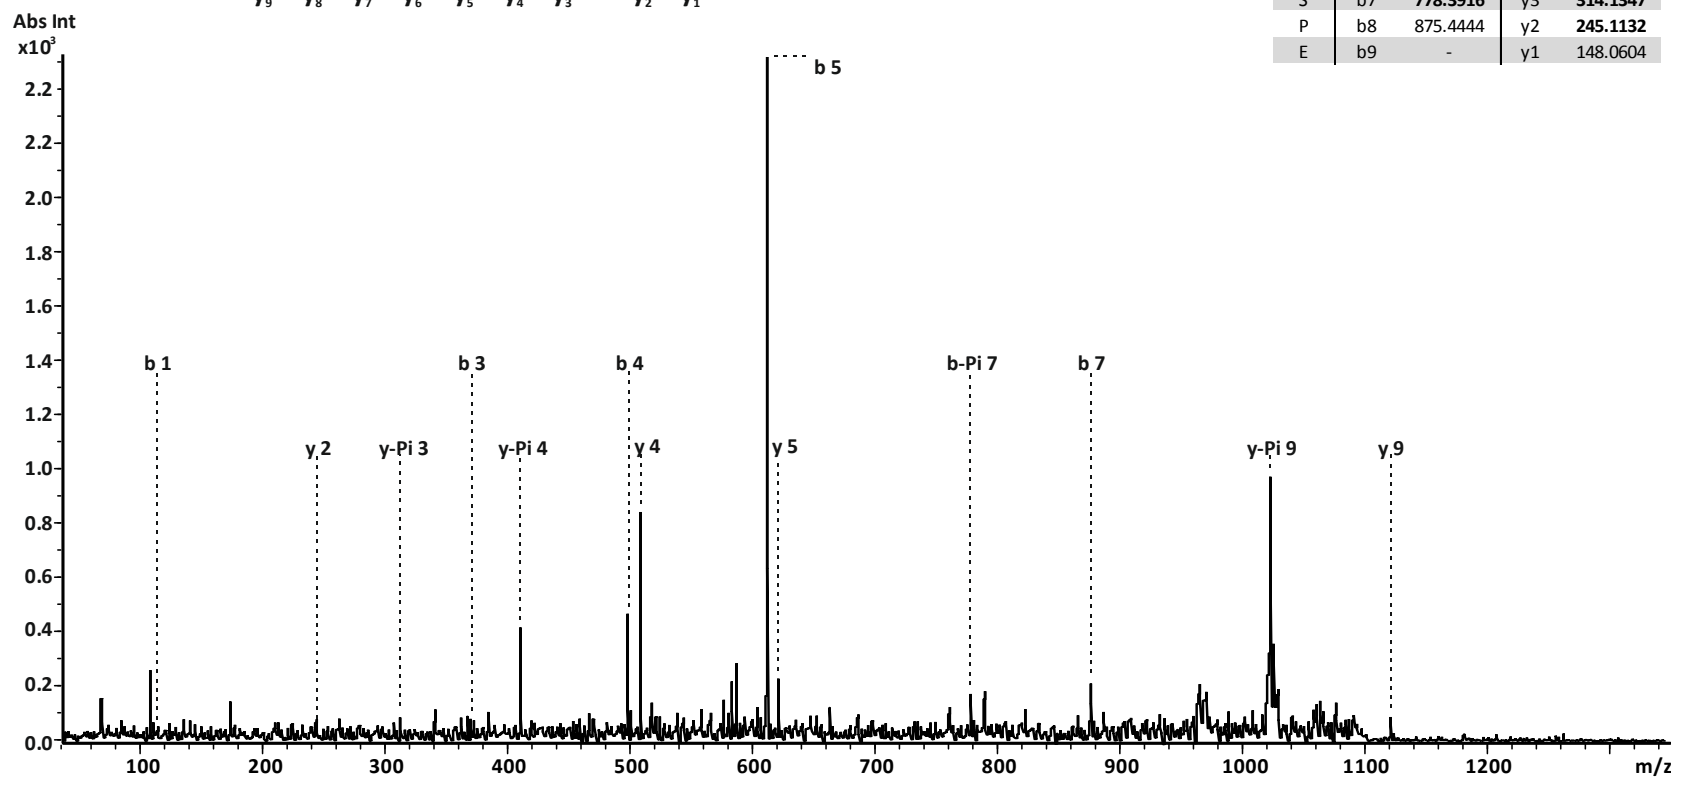

Figure S1

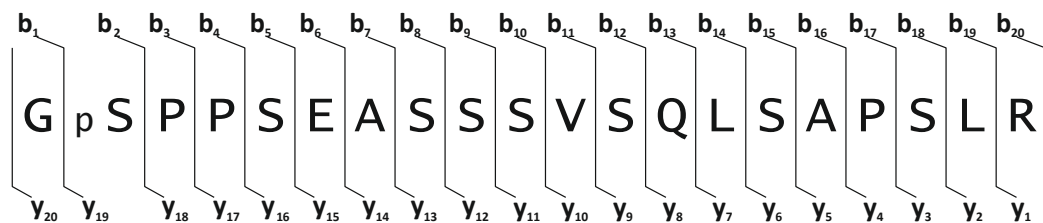

| Seq. | b-ions |                  | y-ions |                  |
|------|--------|------------------|--------|------------------|
| G    | b1     | 58.0287          | y20    | -                |
| S    | b2     | 127.0502         | y19    | 1868.9348        |
| P    | b3     | <b>224.1030</b>  | y18    | <b>1799.9134</b> |
| P    | b4     | 321.1557         | y17    | <b>1702.8606</b> |
| S    | b5     | <b>408.1878</b>  | y16    | <b>1605.8079</b> |
| E    | b6     | <b>537.2304</b>  | y15    | <b>1518.7758</b> |
| A    | b7     | <b>608.2675</b>  | y14    | <b>1389.7332</b> |
| S    | b8     | <b>695.2995</b>  | y13    | <b>1318.6961</b> |
| S    | b9     | <b>782.3315</b>  | y12    | <b>1231.6641</b> |
| S    | b10    | 869.3635         | y11    | <b>1144.6321</b> |
| V    | b11    | <b>968.4320</b>  | y10    | <b>1057.6000</b> |
| S    | b12    | 1055.4640        | y9     | <b>958.5316</b>  |
| Q    | b13    | <b>1183.5226</b> | y8     | <b>871.4996</b>  |
| L    | b14    | <b>1296.6066</b> | y7     | <b>743.4410</b>  |
| S    | b15    | <b>1383.6387</b> | y6     | <b>630.3570</b>  |
| A    | b16    | 1454.6758        | y5     | <b>543.3249</b>  |
| P    | b17    | 1551.7285        | y4     | <b>472.2878</b>  |
| S    | b18    | 1638.7606        | y3     | <b>375.2350</b>  |
| L    | b19    | 1751.8446        | y2     | <b>288.2030</b>  |
| R    | b20    | -                | y1     | <b>175.1190</b>  |

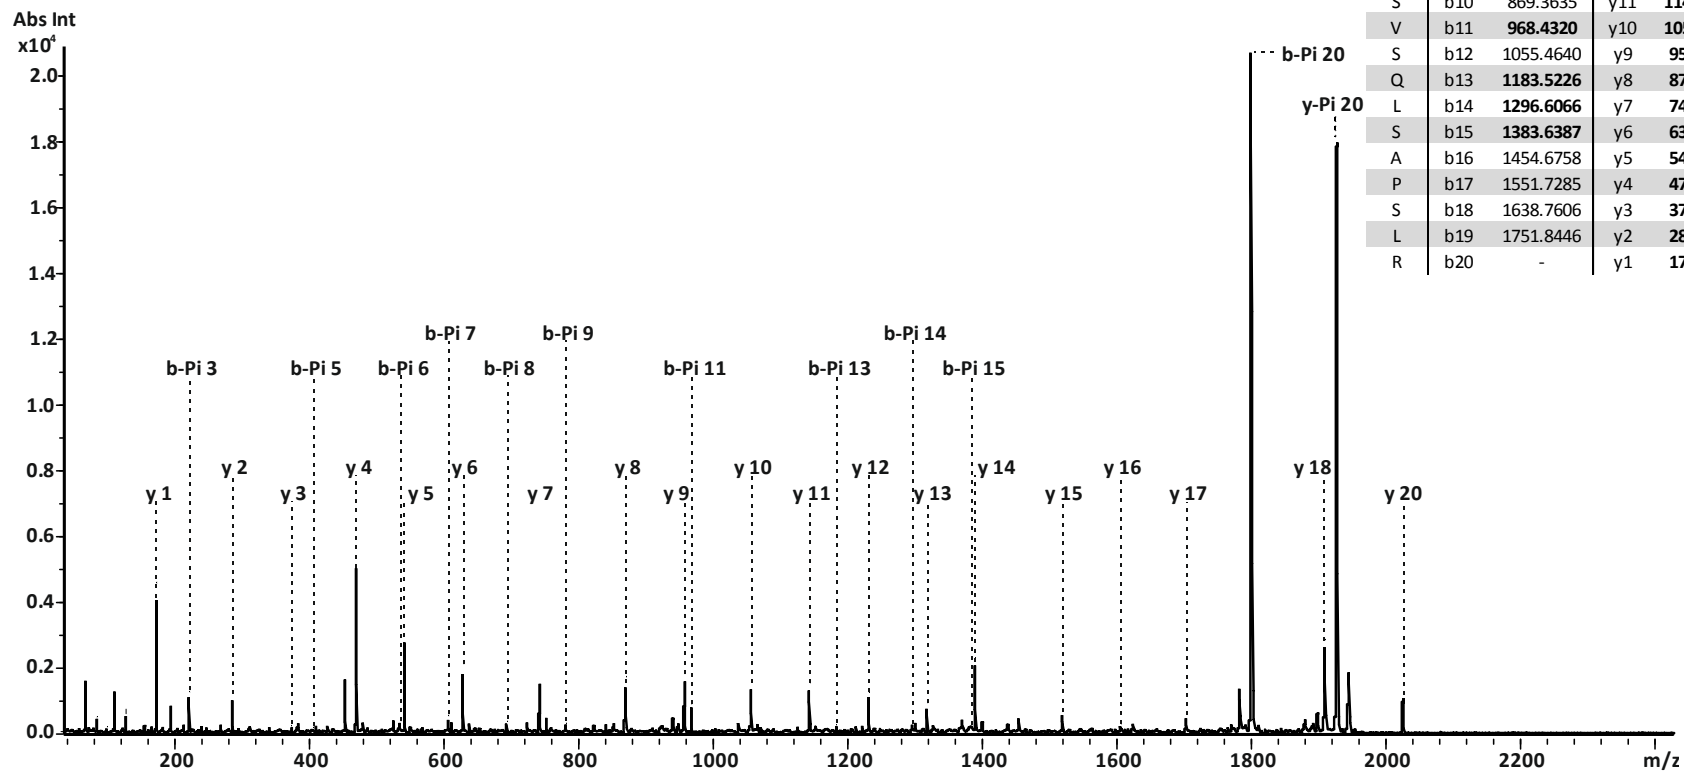

Figure S2

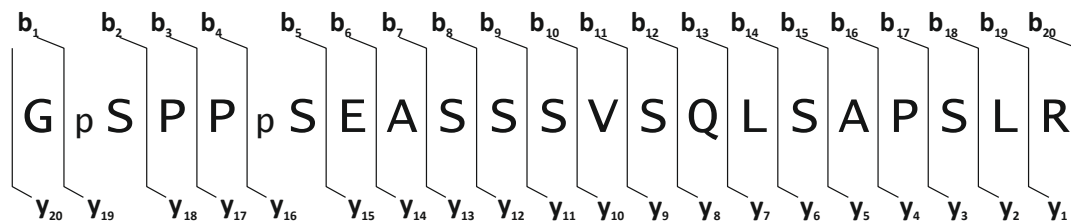

| Seq.     | b-ions     |                  | y-ions |                  |
|----------|------------|------------------|--------|------------------|
| G        | b1         | 58.0287          | y20    | -                |
| S        | b2         | 127.0502         | y19    | 1850.9243        |
| <b>P</b> | <b>b3</b>  | <b>224.1030</b>  | y18    | <b>1781.9028</b> |
| P        | b4         | 321.1557         | y17    | 1684.8501        |
| S        | b5         | 390.1772         | y16    | 1587.7973        |
| E        | b6         | 519.2198         | y15    | 1518.7758        |
| <b>A</b> | <b>b7</b>  | <b>590.2569</b>  | y14    | <b>1389.7332</b> |
| S        | b8         | 677.2889         | y13    | 1318.6961        |
| <b>S</b> | <b>b9</b>  | <b>764.3210</b>  | y12    | <b>1231.6641</b> |
| S        | b10        | 851.3530         | y11    | <b>1144.6321</b> |
| <b>V</b> | <b>b11</b> | <b>950.4214</b>  | y10    | <b>1057.6000</b> |
| S        | b12        | 1037.4534        | y9     | <b>958.5316</b>  |
| <b>Q</b> | <b>b13</b> | <b>1165.5120</b> | y8     | <b>871.4996</b>  |
| L        | b14        | 1278.5961        | y7     | <b>743.4410</b>  |
| S        | b15        | 1365.6281        | y6     | <b>630.3570</b>  |
| A        | b16        | 1436.6652        | y5     | <b>543.3249</b>  |
| <b>P</b> | <b>b17</b> | <b>1533.7180</b> | y4     | <b>472.2878</b>  |
| S        | b18        | 1620.7500        | y3     | 375.2350         |
| <b>L</b> | <b>b19</b> | <b>1733.8341</b> | y2     | <b>288.2030</b>  |
| R        | b20        | -                | y1     | <b>175.1190</b>  |

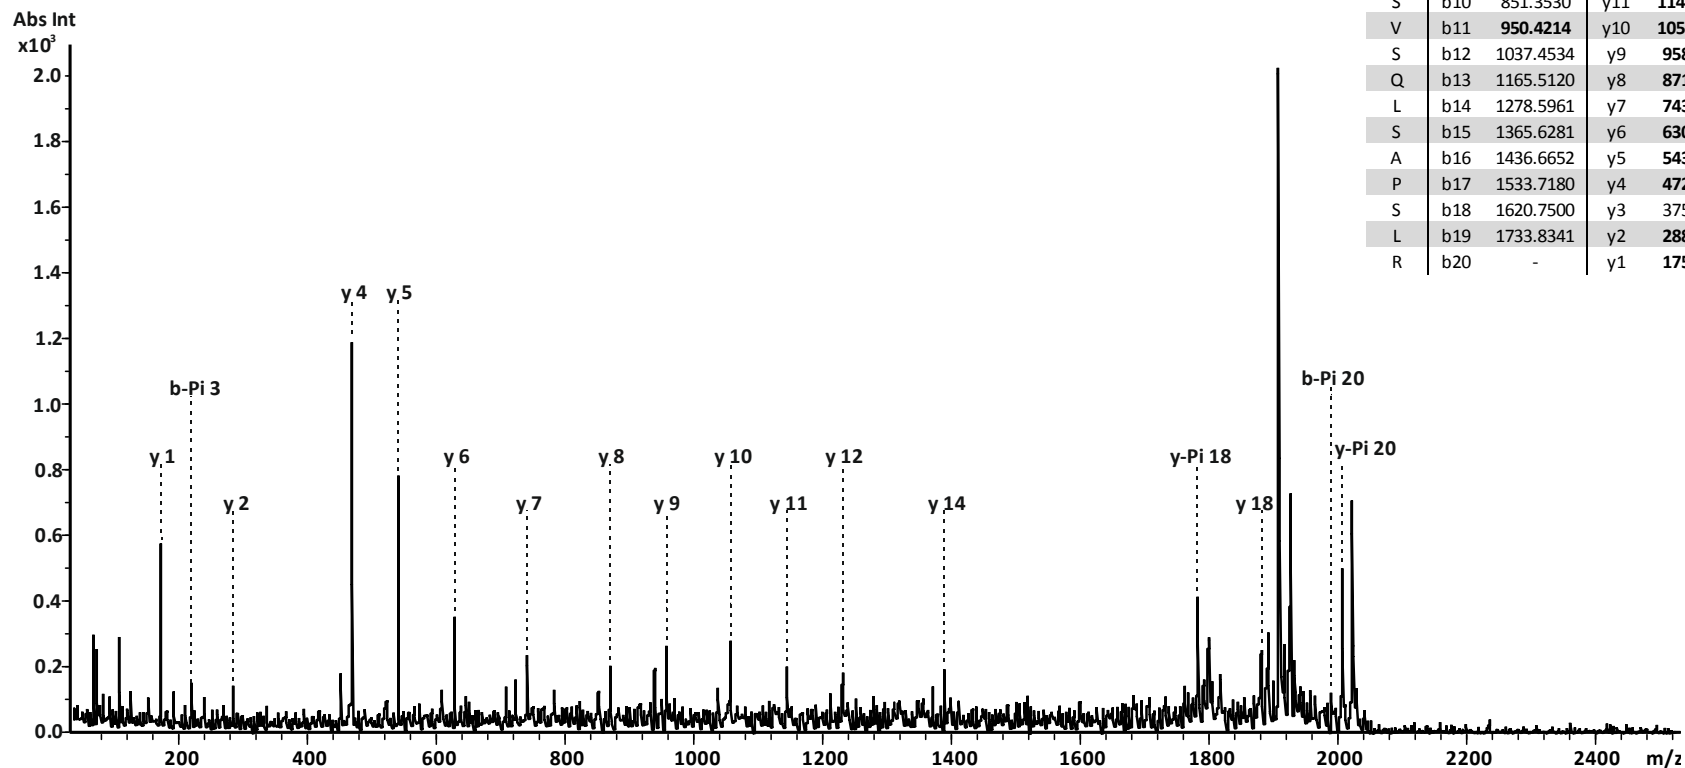

Figure S3

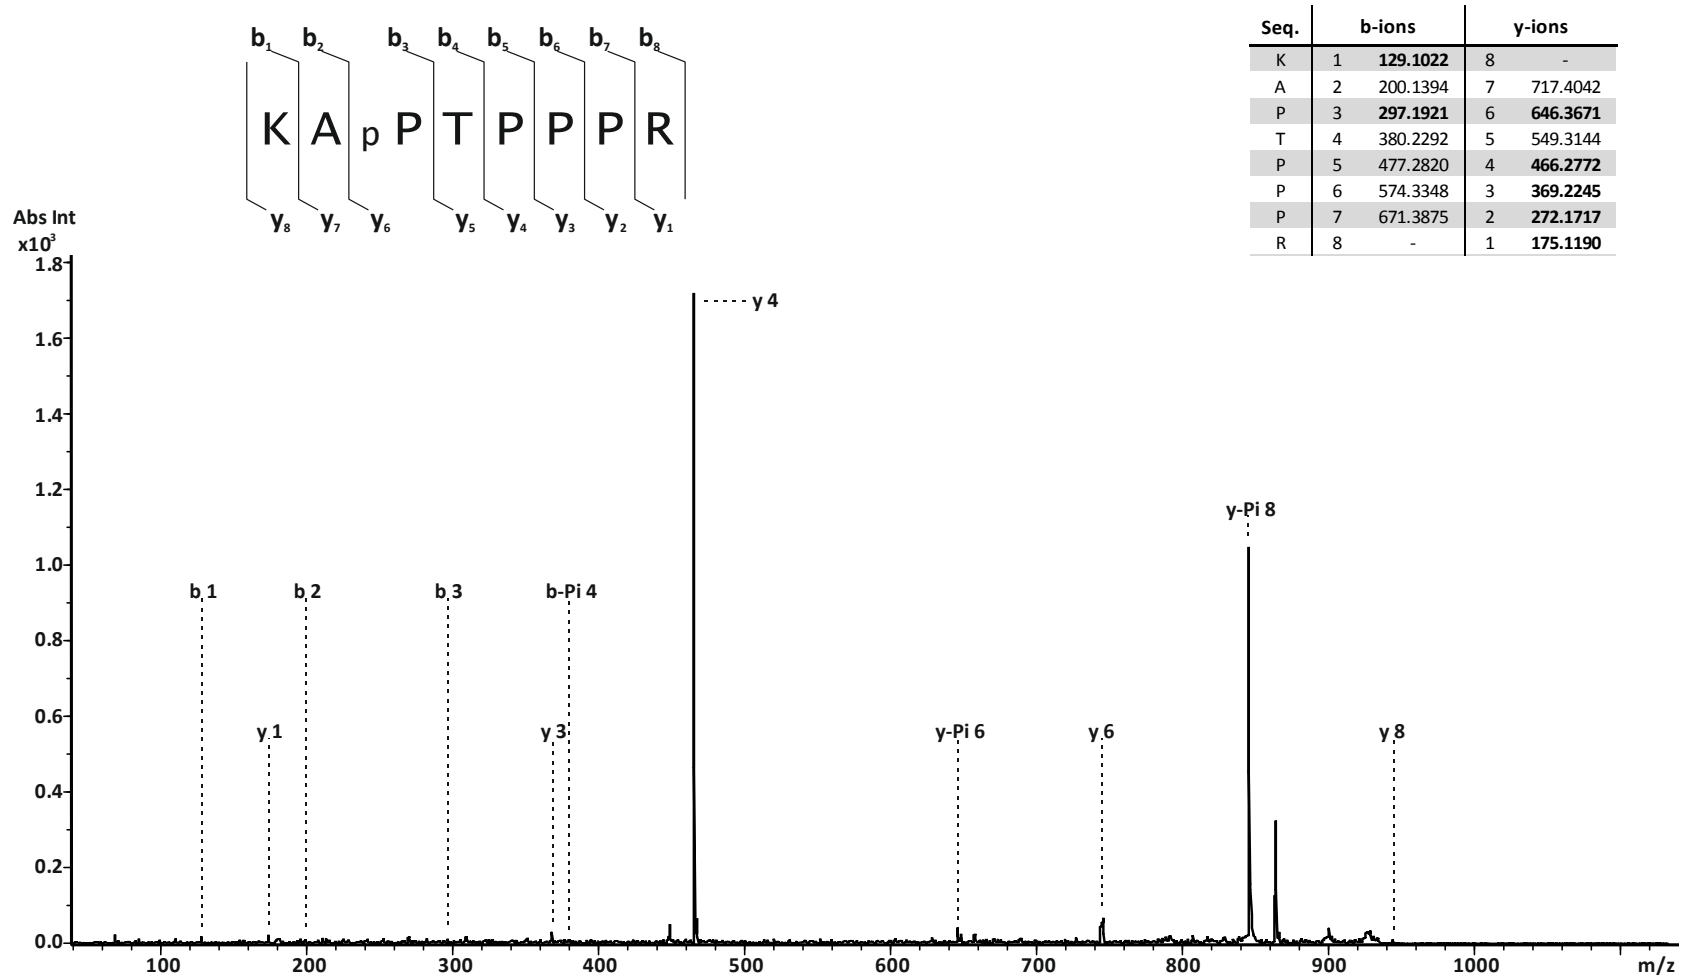

Figure S4

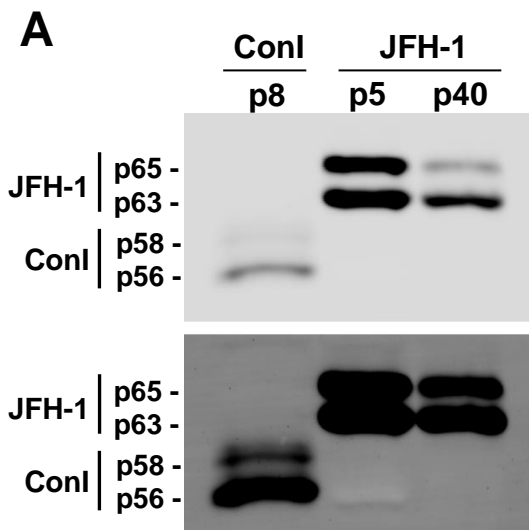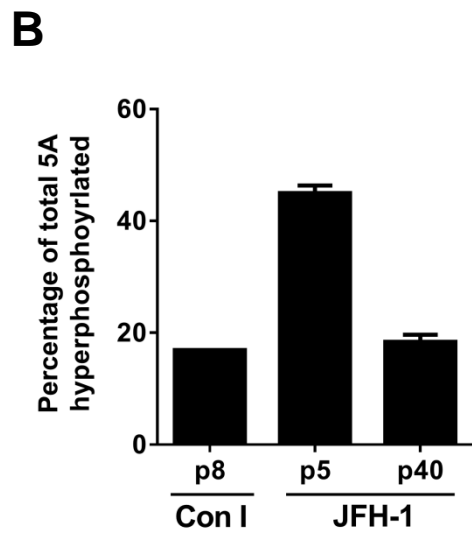

Figure S5

**A**

JFH-1 P2  
 345 - K A **P T P P R R R R** - 355

**B**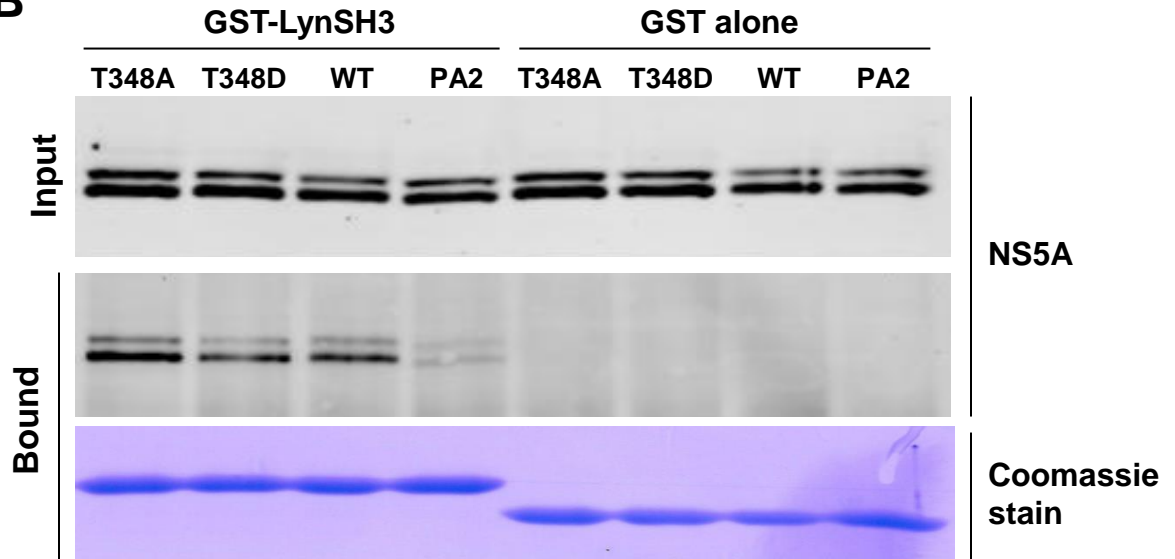**C**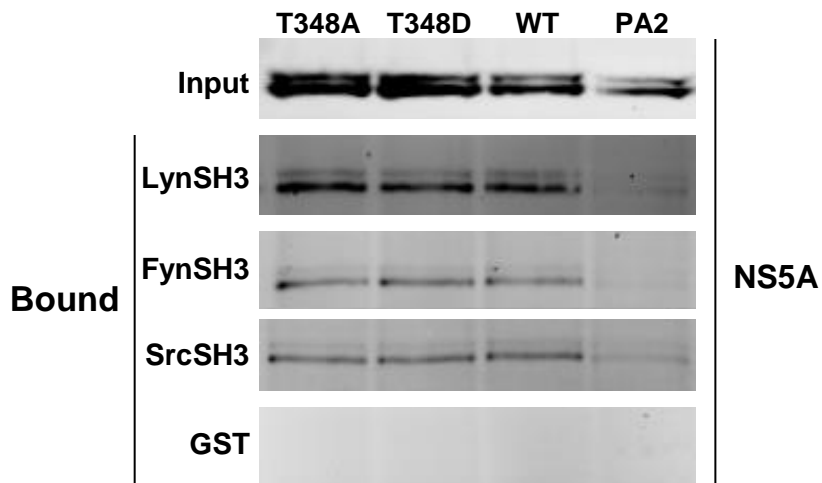**Figure S6**

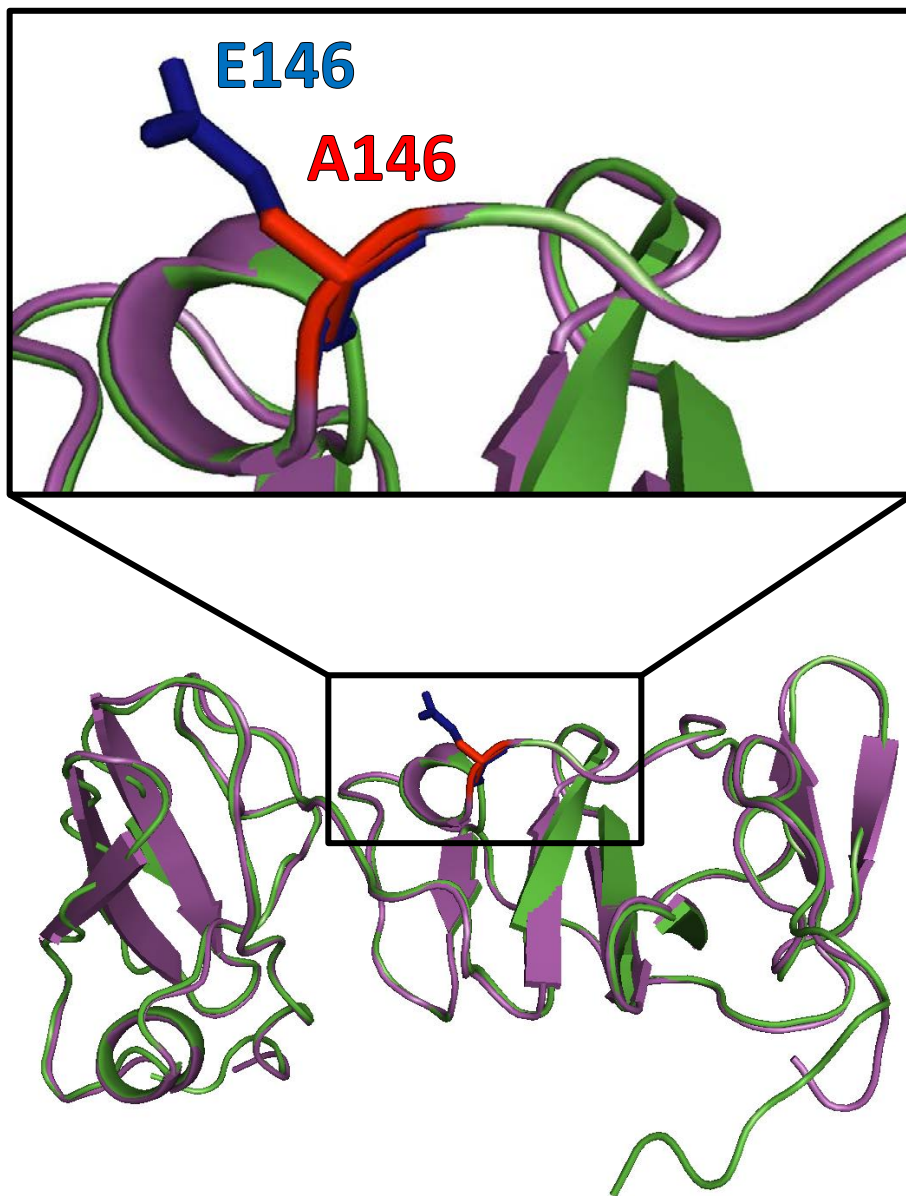

Figure S7

1  
2  
3  
4  
5  
6  
7  
8  
9  
10  
11  
12  
13  
14  
15  
16  
17  
18  
19  
20  
21  
22  
23

### Supplementary Figure legends.

**Figure S1. Identification of S146 phosphorylation site.** MS/MS spectra of precursor ion 1120 m/z, analysed by Mascot software (Matrix Science). B and y ions observed are shown on the MS/MS spectra as well as highlighted in the table as bold. Illustration of the phosphopeptide 1120 with the location of phosphorylation site indicated.

**Figure S2. Identification of S222 phosphorylation site.** MS/MS spectra of precursor ion 2023 m/z, analysed by Mascot software (Matrix Science). B and y ions observed are shown on the MS/MS spectra as well as highlighted in the table as bold. Illustration of the phosphopeptide 2023 with the location of phosphorylation site indicated.

**Figure S3. Identification of SS222/5 phosphorylation sites.** MS/MS spectra of precursor ion 2103 m/z, analysed by Mascot software (Matrix Science). B and y ions observed are shown on the MS/MS spectra as well as highlighted in the table as bold. Illustration of the phosphopeptide 2103 with the location of phosphorylation site indicated.

**Figure S4. Identification of T348 phosphorylation site.** MS/MS spectra of precursor ion 943 m/z, analysed by Mascot software (Matrix Science). B and y ions observed are shown on the MS/MS spectra as well as highlighted in the table as bold. Illustration of the phosphopeptide 943 with the location of phosphorylation site indicated.

**Figure S5. The effect of long term passage on the hyperphosphorylation of NS5A.**



24 SGR-neo-JFH-1 or Con1 RNAs were electroporated into Huh7 cells and stable cell  
25 lines subjected to G418 selection (1 mg/ml) for 20 days, followed by a 1:5 passage  
26 every 3 days at 0.5 mg/ml G418. **(A)** After the indicated number of passages cells  
27 were lysed in GLB and lysates analysed by SDS-PAGE/Western blot probing for  
28 NS5A (9E10). The difference in the apparent molecular weight of Con1 and JFH-1  
29 results from the 18 a.a. insertion in domain III of NS5A. **(B)** The percentage of total  
30 NS5A in the hyperphosphorylated species of Con1 and JFH-1 NS5A, p58 and p63  
31 respectively, was quantified. After long term passage there was a drop in the amount  
32 of NS5A phosphorylated from 45% to 18%. n=2, \*\* p <0.01 significance

33 **Figure S6. The phosphorylation of T348 does not affect the binding of SH3**  
34 **domains to the P2 polyproline motif.** **(A)** Sequence of the phosphopeptide from  
35 LCS II showing the conserved prolines (bold) and the phosphorylated threonine  
36 residue (red). **(B)** Lysates from Huh7 cells electroporated with the indicated  
37 subgenomic replicons were subjected to GST pulldown using either GST-LynSH3  
38 (lanes 1-4) or GST alone (lanes 5-8). 5% of the input lysate and the total bound  
39 fraction were analysed by western blot with an anti-NS5A antiserum (sheep).  
40 Equivalent loading of the GST fusions was verified by Coomassie staining (lower  
41 panel). PA2 refers to a mutation of the two prolines highlighted in (A) to alanine [1].  
42 **(C)** As **(B)** but lysates were subjected to GST pulldown using either GST-LynSH3,  
43 FynSH3 or SrcSH3.

44 **Figure S7. Structural prediction of a phosphomimetic at position 146 shows no**  
45 **significant alteration to NS5A domain I monomer structure.** The NS5A Con1  
46 sequence used in both the Tellinghuisen [2] and Love [3] studies was  
47 computationally modelled with a glutamic acid substitution at position A146 using the  
48 Robetta full-chain protein structure prediction server. Five full structure predictions

49 were calculated and model 1 (green) which showed the highest similarity to existing  
50 monomer structures was aligned with the Tellinghuisen et al monomer (magenta) in  
51 PyMol. Residues A146 (red) and E146 (blue) are highlighted. No dramatic shift in  
52 model 1 structure was observed as a result of the A146E substitution, reflecting the  
53 observation that position 146 resides on an external, non-helical/non-beta-sheet  
54 stretch of the peptide chain.

55

56

57 **Supplementary Table S1 Phenotype of mutants in putative LCS I**  
 58 **phosphorylation sites in the context of genotype 1b or 2a.**

**Residue number:**

| <b>NS5A</b> | <b>Polyprotein*</b> | <b>Gt 2a (this study)</b> | <b>Gt 2a [4]</b> | <b>Gt 1b [5]</b> |
|-------------|---------------------|---------------------------|------------------|------------------|
| S222        | 2194                | A wildtype                | A wildtype       | A wildtype       |
|             |                     | D wildtype                | D not tested     | E wildtype       |
| S225        | 2197                | A down 6 fold             | A down 3 fold    | A Up 6 fold      |
|             |                     | D wildtype                | E wildtype       | E wildtype       |
| S228        | 2200                | A wildtype                | A wildtype       | A wildtype       |
|             |                     | D wildtype                | D not tested     | E wildtype       |
| S229        | 2201                | A down >1000 fold         | A no replication | A up >10 fold    |
|             |                     | D down >1000 fold         | E no replication | E up 50 fold     |
| S230        | 2202                | A wildtype                | A wildtype       | A up 5 fold      |
|             |                     | D wildtype                | D not tested     | E wildtype       |
| S232        | 2204                | A down 10 fold            | A down 10 fold   | A up >10 fold    |
|             |                     | D wildtype                | E wildtype       | E wildtype       |
| S235        | 2207                | A not tested              | A no replication | A up >10 fold    |
|             |                     | D wildtype                | E wildtype       | E wildtype       |
| S238        | 2210                | A not tested              | A wildtype       | A wildtype       |
|             |                     | D wildtype                | D not tested     | E wildtype       |

59

60 \* Gt 1b polyprotein numbering

61 **Supplementary References**

62 1. Hughes M, Gretton S, Shelton H, Brown DD, McCormick CJ, Angus AG, Patel AH,  
 63 Griffin S, Harris M (2009) A conserved proline between domains II and III of hepatitis  
 64 C virus NS5A influences both RNA replication and virus assembly. *J Virol* 83: 10788-  
 65 10796.

66 2. Tellinghuisen TL, Marcotrigiano J, Rice CM (2005) Structure of the zinc-binding  
 67 domain of an essential component of the hepatitis C virus replicase. *Nature* 435:  
 68 374-379.

69 3. Love RA, Brodsky O, Hickey MJ, Wells PA, Cronin CN (2009) Crystal structure of  
 70 a novel dimeric form of NS5A domain I protein from hepatitis C virus. *J Virol* 83:  
 71 4395-4403.

72 4. Fridell RA, Valera L, Qiu D, Kirk MJ, Wang C, Gao M (2013) Intragenic  
73 complementation of hepatitis C virus NS5A RNA replication-defective alleles. *J Virol*  
74 87: 2320-2329.

75

76 5. Appel N, Pietschmann T, Bartenschlager R (2005) Mutational analysis of hepatitis  
77 C virus nonstructural protein 5A: potential role of differential phosphorylation in RNA  
78 replication and identification of a genetically flexible domain. *J Virol* 79: 3187-3194.

79
